# Supplementary material for: SnO2 nanowall-arrays coated with rutile-TiO2 nanoneedles for high performance dye-sensitized solar cells
Source: Royal Society of Chemistry journal article supplement (doi:10.1039/c2dt31317k), 2012-01-01
Supplement: c2dt31317k.pdf [file c2dt31317k.pdf]

# SnO<sub>2</sub> Nanowall-arrays Coated with Rutile-TiO<sub>2</sub> Nanoneedles for High Performance Dye-sensitized Solar Cells

Dipak V. Shinde,<sup>a</sup> Rajaram S. Mane,<sup>a,b</sup> In-Hwan Oh,<sup>c</sup> Joong Kee Lee,<sup>c</sup> and Sung-Hwan Han<sup>\*d</sup>

<sup>\*</sup> Inorganic Nanomaterials Laboratory, Department of Chemistry, Hanyang University, Seongdong -gu, 133791Seoul, Republic of Korea.

## Characterizations

Crystal structure of SnO<sub>2</sub> nanowalls electrodes was determined using X-ray diffractometer (Rigaku D/MAX 2500 V, Cu K $\alpha$ ,  $\lambda$  = 0.15418 nm). The thickness and morphology of the SnO<sub>2</sub> nanowall electrodes were checked with a scanning electron microscope (SEM, Hitachi S-4200). Solar-to-electric power conversion efficiency of the devices were measured by, incorporating individual and dual-sensitized SnO<sub>2</sub> electrodes into a thin layer sandwich-type cells. A Pt-coated FTO was used as counter electrode which was prepared by drop casting 0.04 M isopropanol solution of chloroplatinic acid on FTO followed by heating at 450 deg for 20 min., using a spacer film (50  $\mu$ m thick polyester film) and an electrolyte Iodolyte An-50. Cell performance was measured by irradiation with 100 mW/cm<sup>2</sup> white light (1 Sun) with Air Mass (AM) 0 and 1.5 filters as a solar simulator in the presence of a water filter (450 W xenon lamp, Oriel Instruments). Current was measured by using a Keithley 2400 source meter. Electrochemical impedance spectra were recorded with an Impedance Analyzer (COMPACTSTATe: IVIUM Technologies) in a frequency range of 0.01 Hz to 1.5 MHz with 50 mV amplitude. The measurements of EIS were carried out at open circuit potentials under 1 sun AM 1.5 G light illumination. Impedance parameters were determined by fitting impedance spectra using Z-view software.

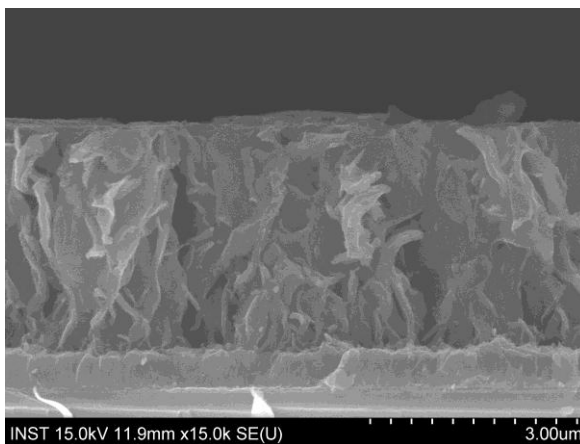

Fig. S1. Cross- section SEM image of SnO<sub>2</sub> nanowall arrays on FTO showing thickness around 3.2 μm.

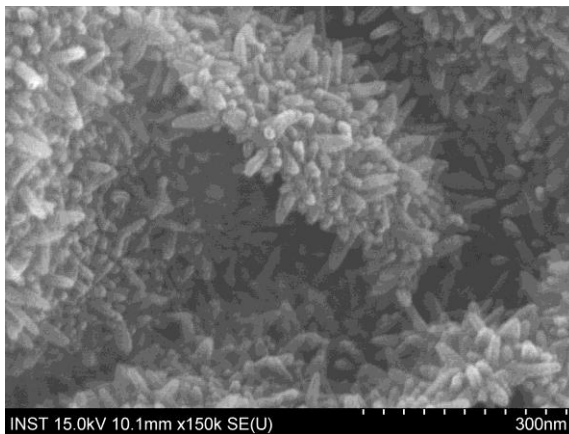

Fig. S2. High resolution SEM image of SnO<sub>2</sub> nanowall electrode showing full coverage of TiO<sub>2</sub> nanoneedles.

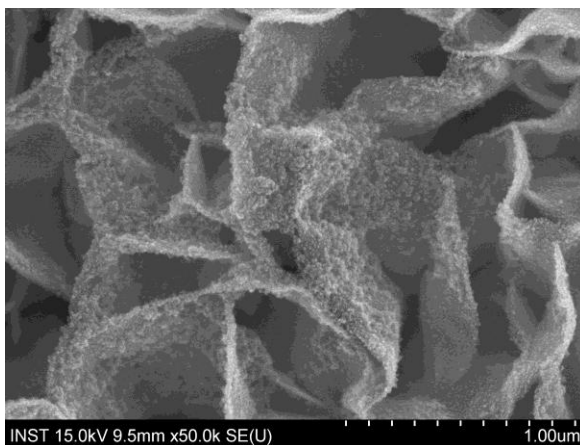

Fig. S3. SEM image of SnO<sub>2</sub> nanowall electrodes covered with TiO<sub>2</sub> particles.

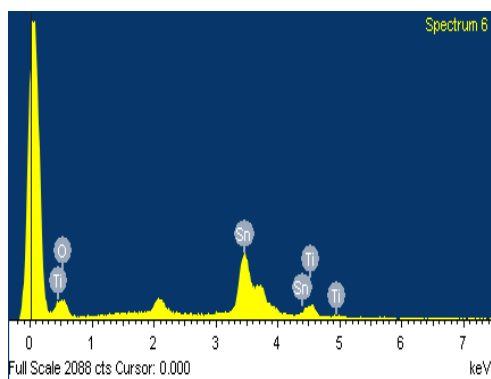

Fig. S4. EDX pattern of  $\text{SnO}_2\text{-TiO}_2$  electrode

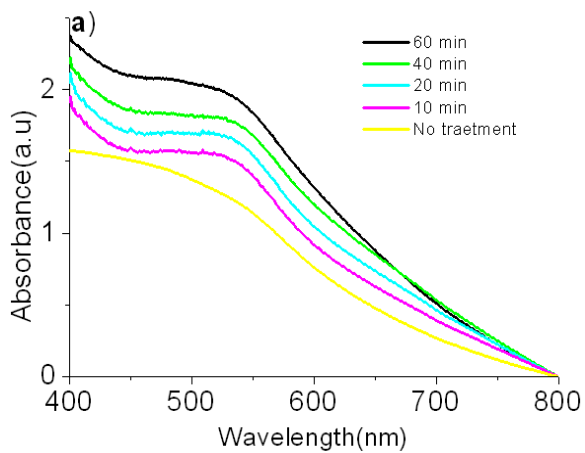

Fig. S5 UV-Visible absorption spectra of  $\text{SnO}_2$  electrodes with various  $\text{TiCl}_4$  treatment time.

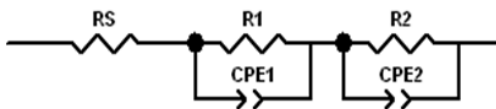

Fig. S6. Equivalent circuit used to fit impedance data.
